# Supplementary material for: Oral administration of VDAC1-derived small molecule peptides increases circulating testosterone levels in male rats
Source: Frontiers journal article supplement (doi:10.3389/fendo.2022.1003017), 2023-01-04

## Supplemental Data

### **Oral administration of VDAC1-derived small molecule peptides increases circulating testosterone levels in rats**

Daniel B. Martinez–Arguelles<sup>1</sup>, Jennifer W. Nedow<sup>1</sup>, Hovhannes J. Gukasyan<sup>2</sup> and Vassilios Papadopoulos<sup>1,2\*</sup>

<sup>1</sup>Research Institute of the McGill University Health Centre and Department of Medicine, McGill University, 1001 Decarie Blvd, Bloc E, Montreal, Quebec, H4A 3J1, Canada.

<sup>2</sup>Department of Pharmacology and Pharmaceutical Sciences, School of Pharmacy, University of Southern California, 1985 Zonal Avenue, Los Angeles, California 90089, USA.

Supplemental Figures: 2

**Figure S1. Dose scan of TV159-172 infused subcutaneously.** Sprague-Dawley rats were implanted with osmotic pumps delivering various concentrations of TV159-172 for 1 week. Levels of intratesticular testosterone (A), serum testosterone (B), dihydrotestosterone (C), luteinizing hormone (D), estradiol (E), corticosterone (F), and aldosterone (G) were measured in day 7 as described under material and methods. Data shown represent means  $\pm$  standard deviation (N=5).

**Figure S2. Modifications to the RVTQ core increase plasma testosterone levels after oral administration.** A) Testosterone levels in Brown-Norway rats 3 hrs after gavage with RVTQ and indicated RVTQ derivatives used at the indicated concentrations. Age of Brown-Norway rats during experiment was 60-123 days-old; N = 7; results shown as mean  $\pm$  SD; \*p<0.05; T denotes the order with which the peptides were tested.

**A.**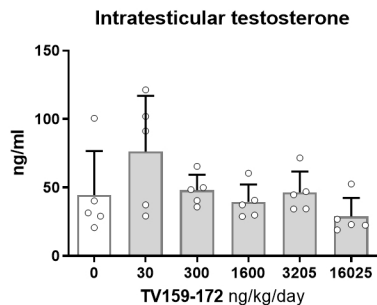**B.**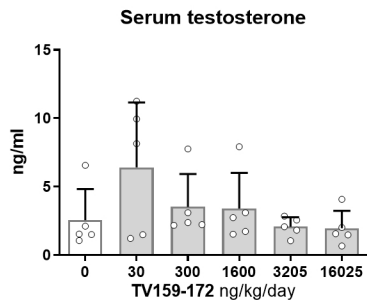**C.**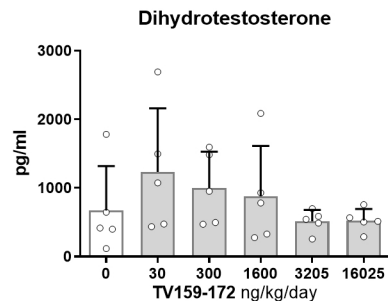**D.**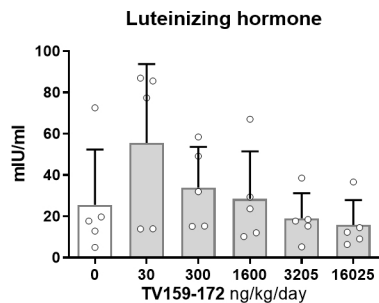**E.**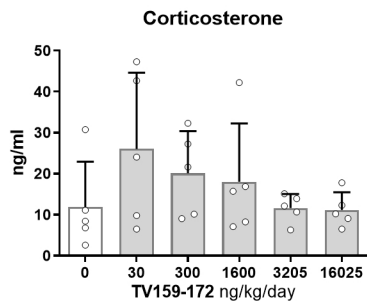**F.**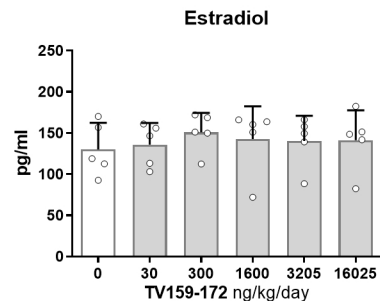**G.**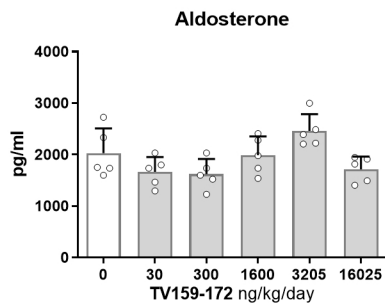**Figure S1**

A)

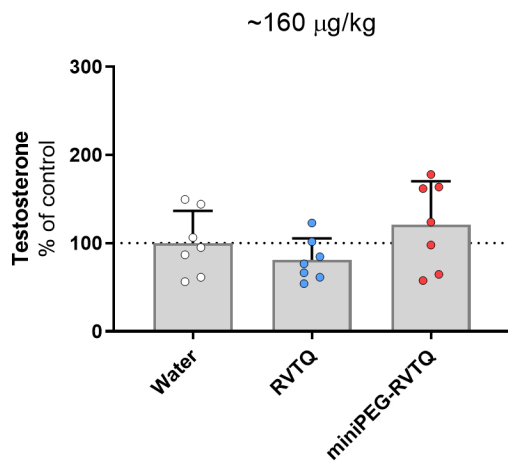

B)

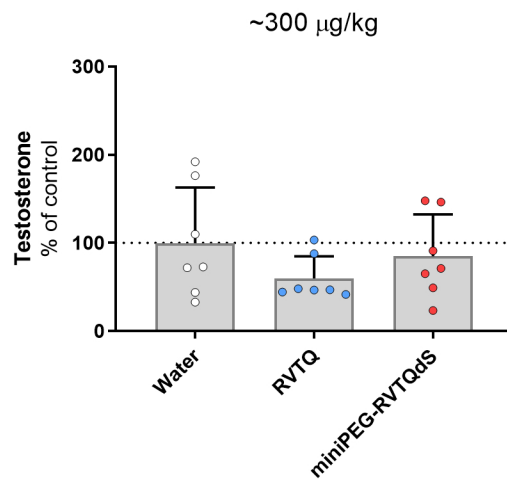

C)

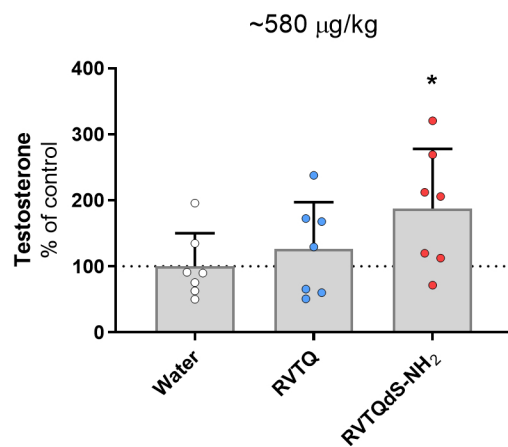

D)

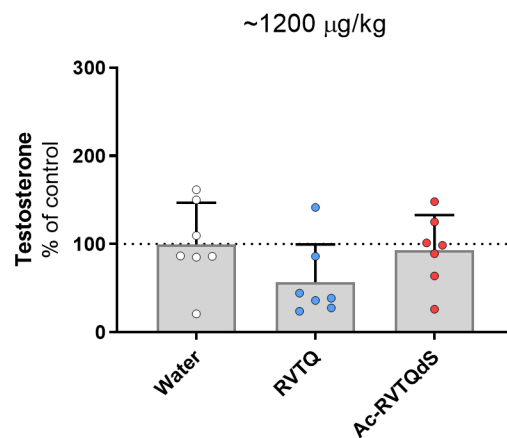

E)

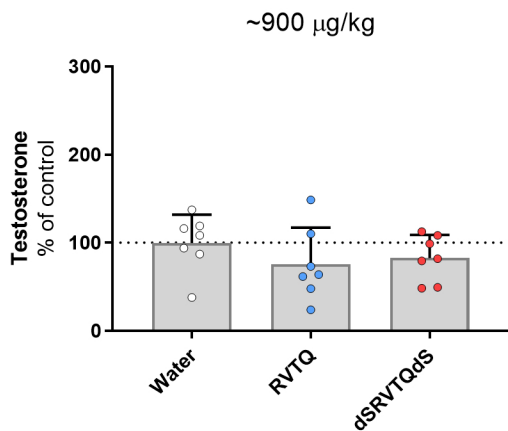

F)

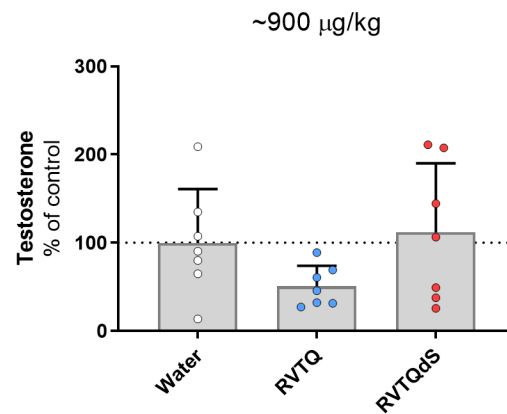

Supplement: Presentation_1.pdf [file Presentation_1.pdf]
